# Supplementary material
Source: PubMed Central journal article supplement (PMC3545310)

Figure 1

A

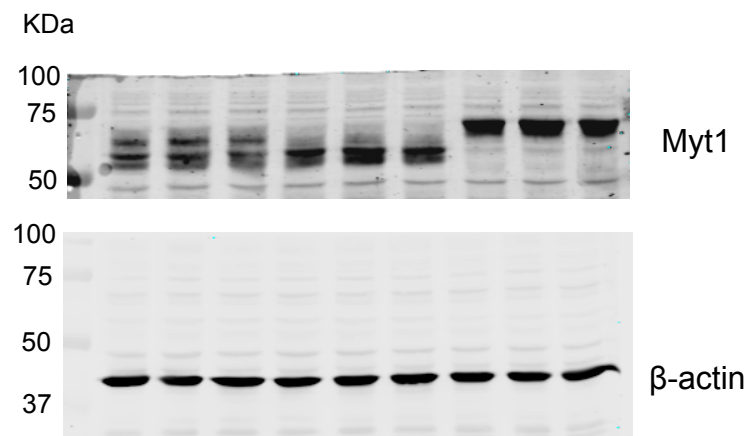

B

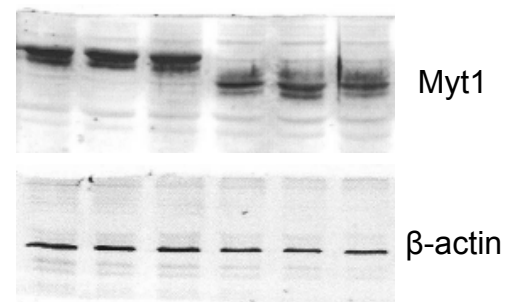

C

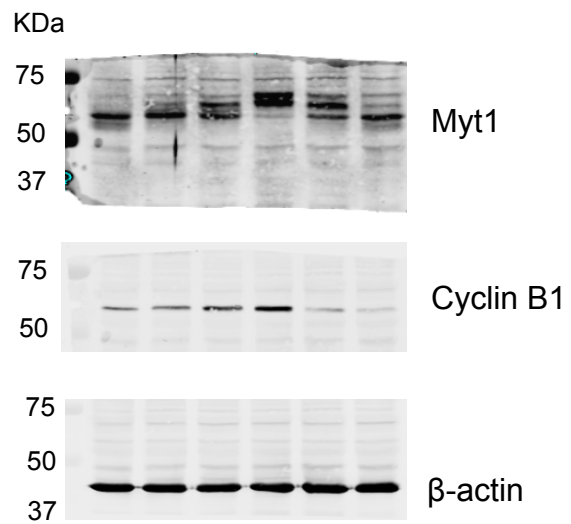

D

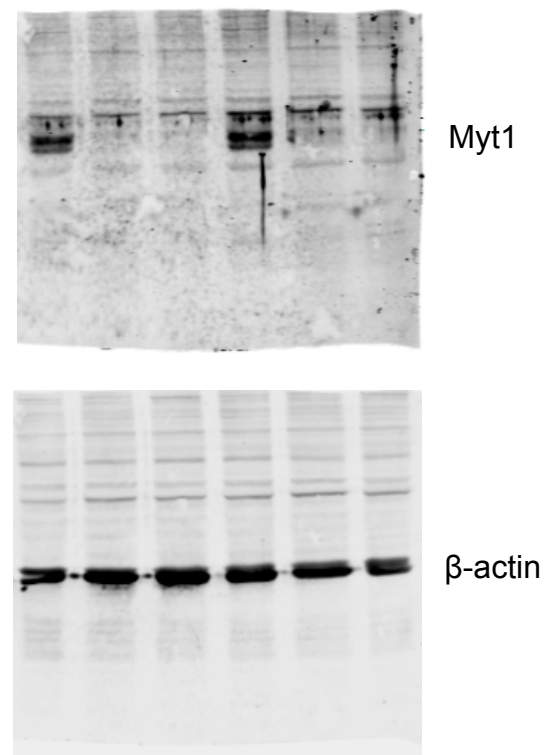

Supplement: emboj2012329df1.pdf [file emboj2012329df1.pdf]

Figure 3B

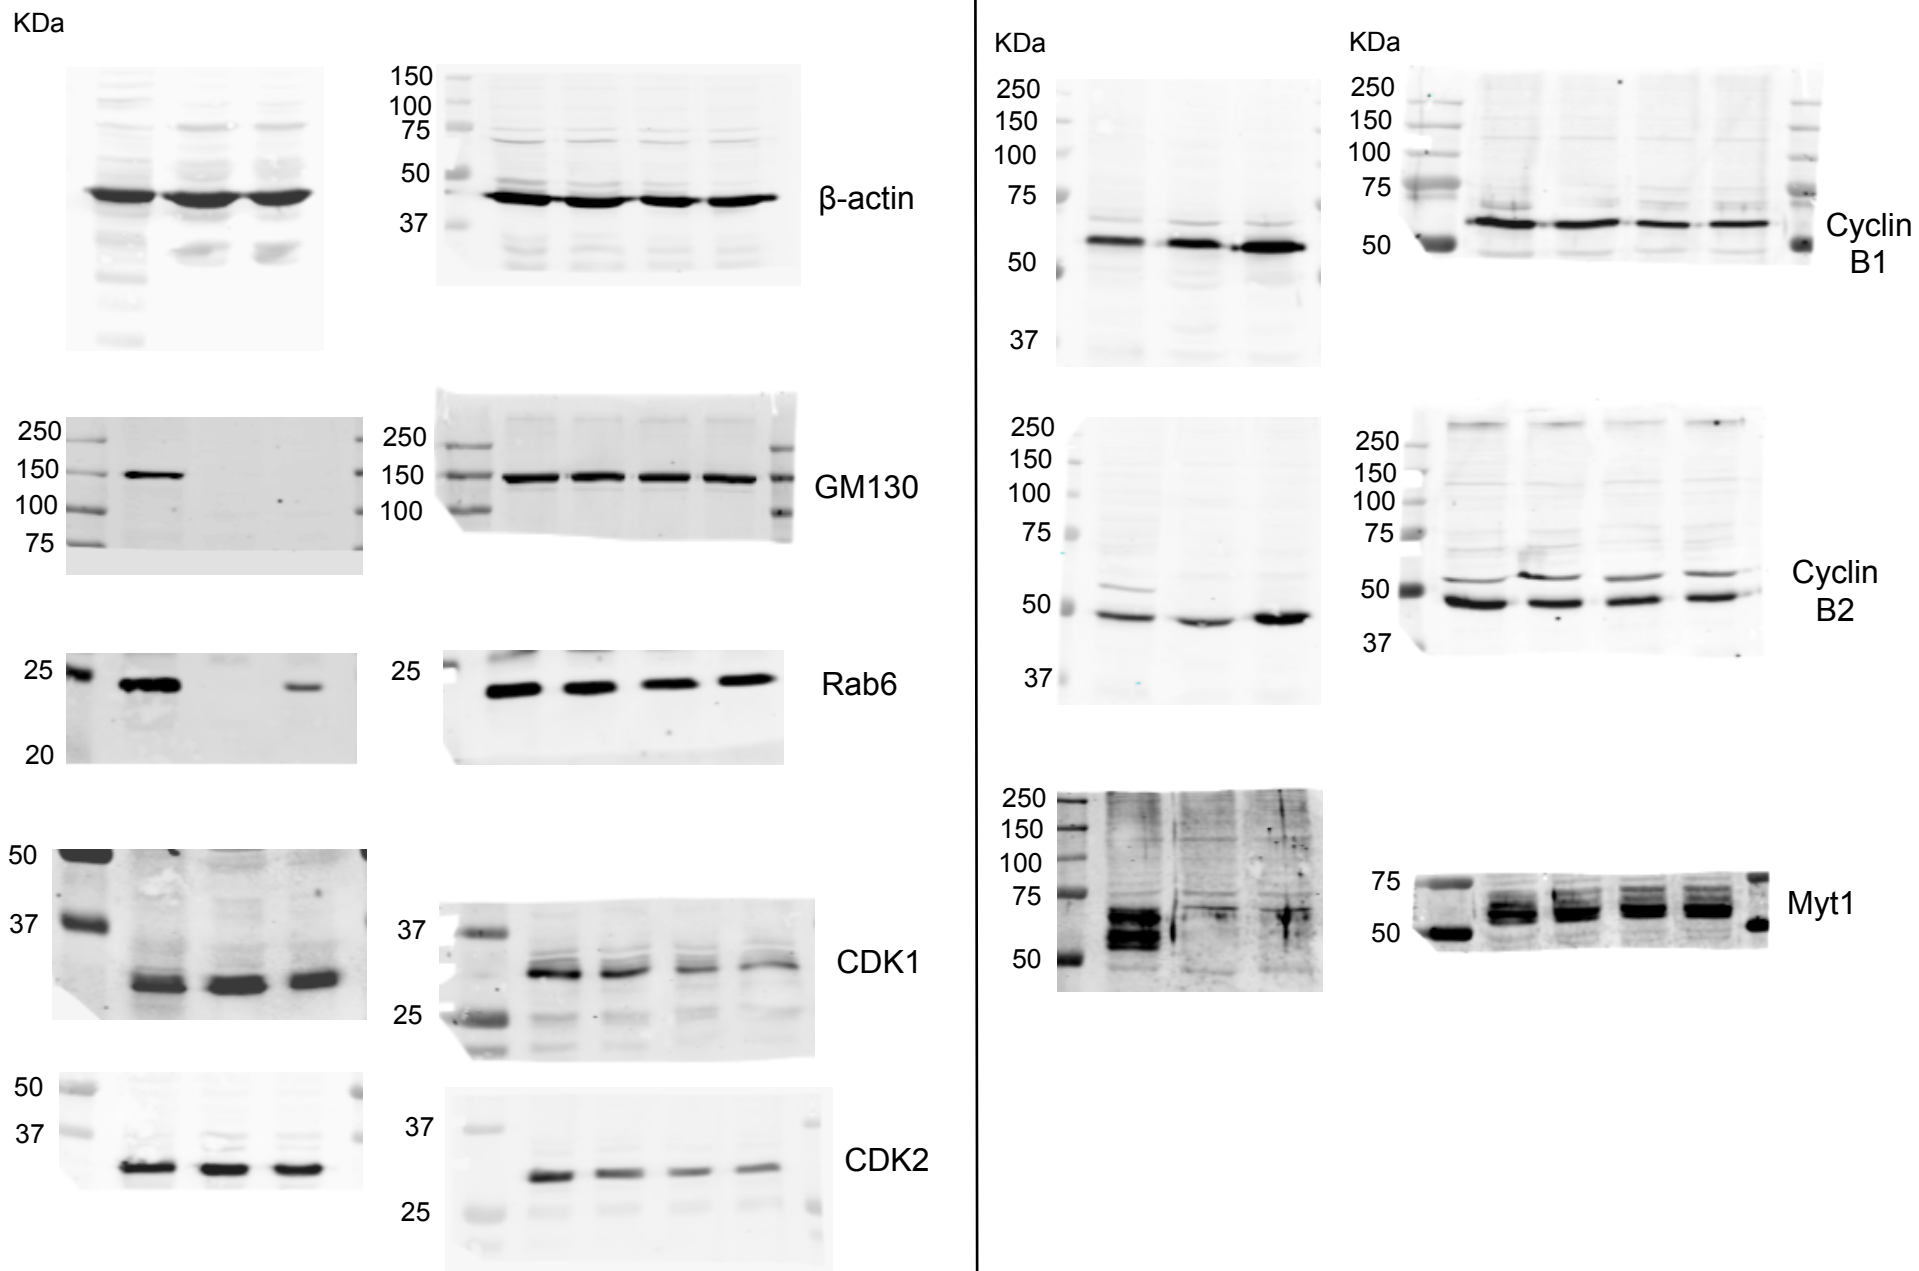

Supplement: emboj2012329df3b.pdf [file emboj2012329df3b.pdf]

Figure 7A

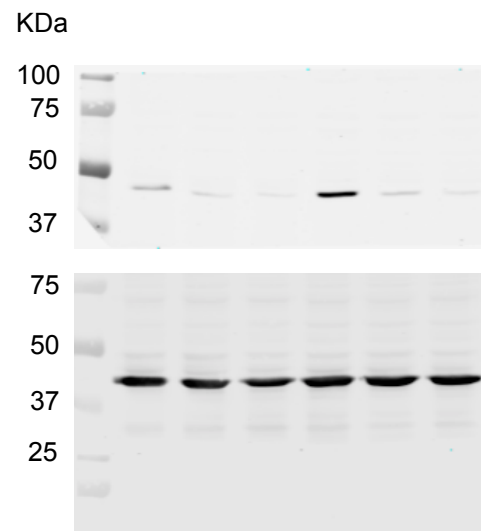

Supplement: emboj2012329df7a.pdf [file emboj2012329df7a.pdf]

Figure 8

A

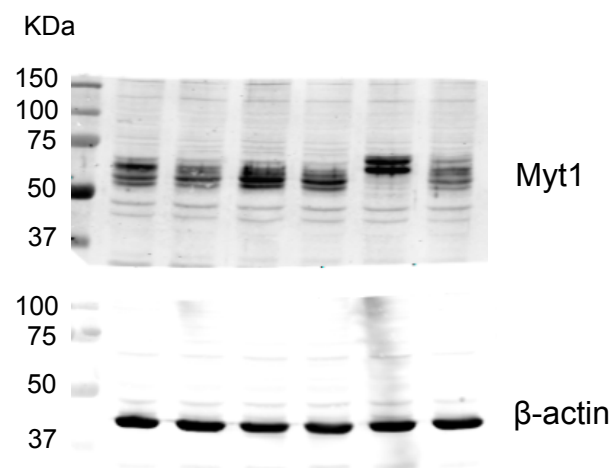

B

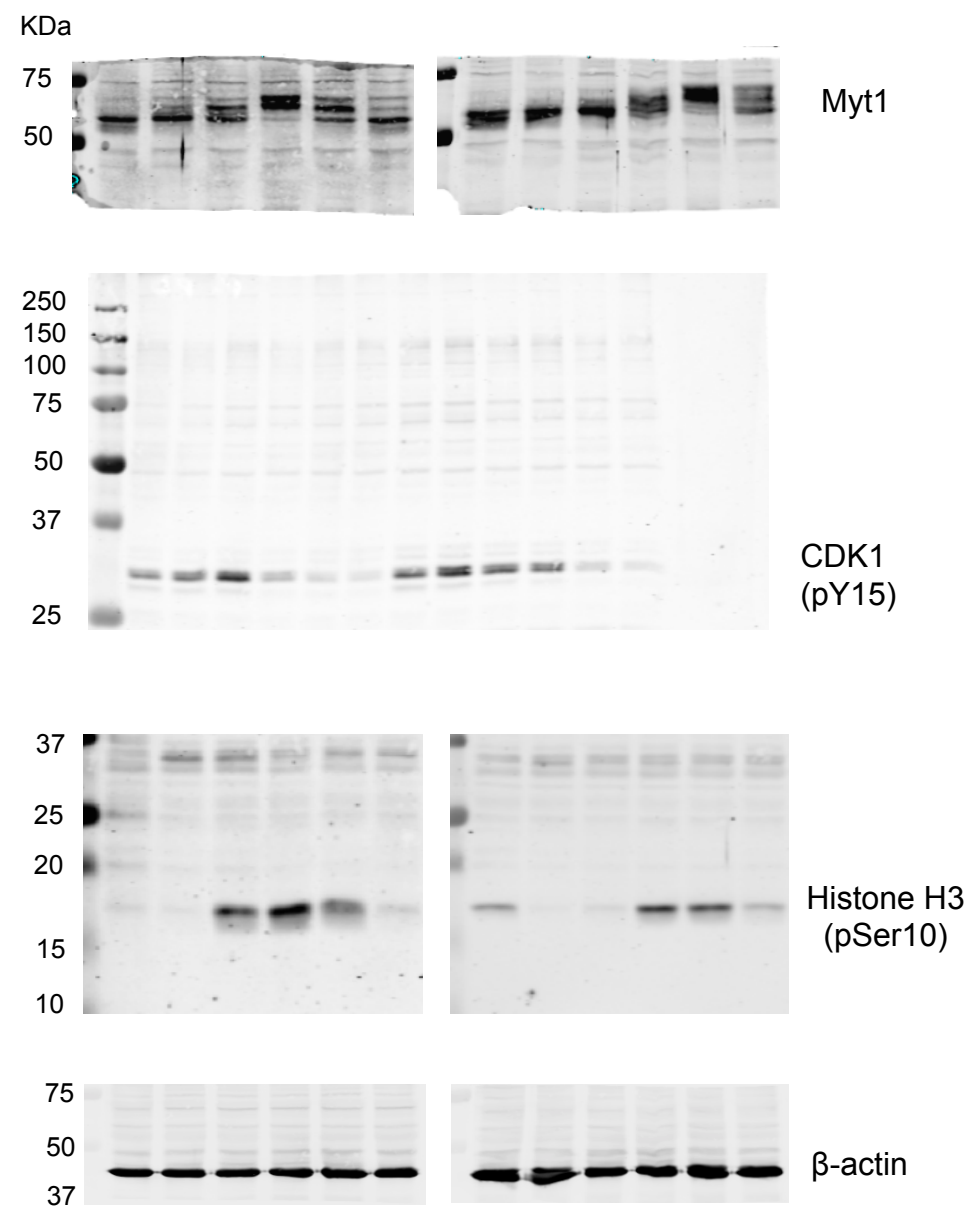

Figure 8

C

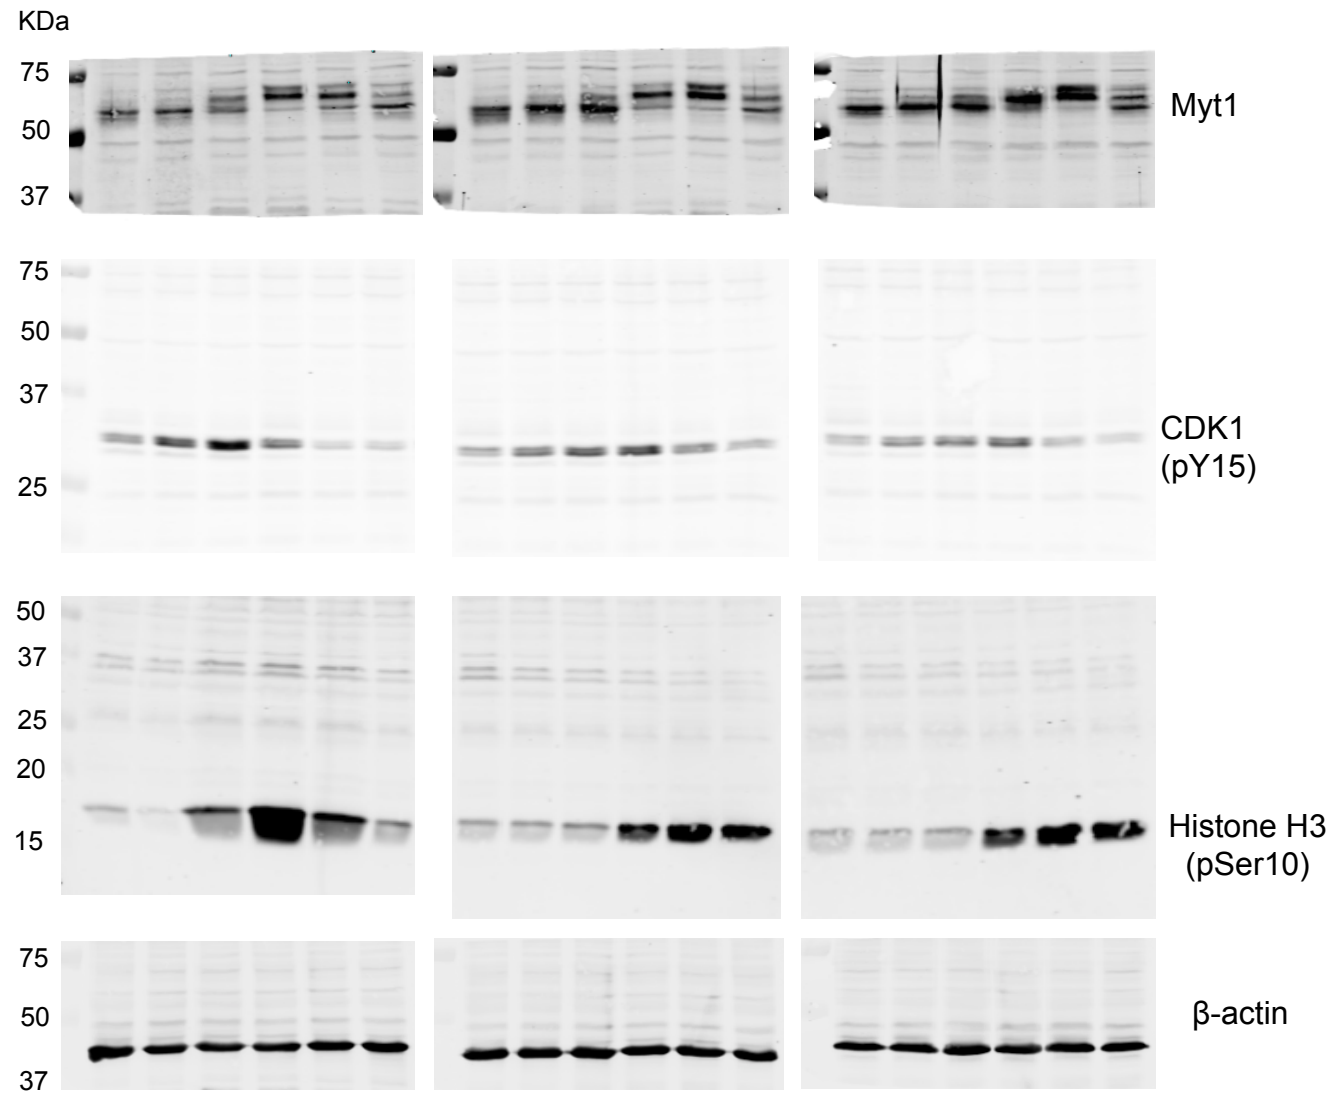

D

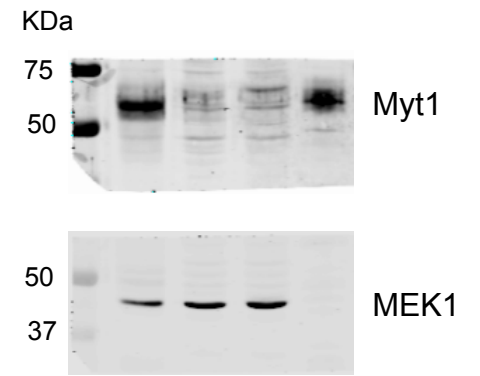

E Figure 8E

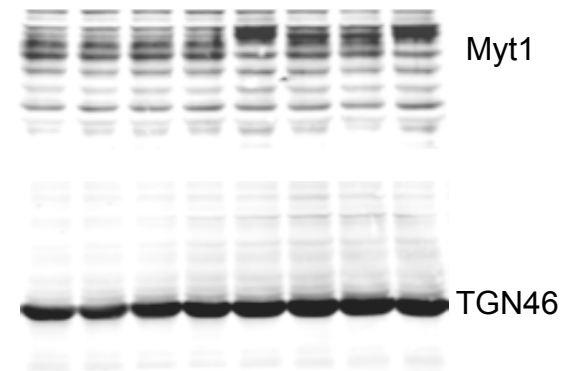

Supplement: emboj2012329df8.pdf [file emboj2012329df8.pdf]
